# Supplementary material
Source: publisher figshare collection journal article supplement (https://frontiersin.figshare.com/ndownloader/files/14963714)
Supplement: Supplementary file 1 [file 14963714]

# Supplementary Material:

## Presupposition accommodation of the German additive particle *auch* (= ‘too’)

### 1 SUPPLEMENTARY DATA: ITEMS OF EXPERIMENT 1

The levels of the between-items factor DISCOURSE TYPE were distributed as follows in both experiments:

- Items 1–6: non-facilitating
- Items 7–12: facilitating perspective
- Items 13–18: facilitating coherence

(1) illustrates how the conditions correspond to the levels of the other factors TRIGGER TYPE and CONTEXT. This holds analogously for the remaining items, where the levels are not explicitly annotated.

- (1) MIXED CONTEXT: Dennis wollte mit Carlotta an die Ostsee fahren. Leider ist Carlotta krank. Aber Dennis kann alleine fahren, ‘Dennis wanted to go to the Baltic Sea with Carlotta. Unfortunately, Carlotta is ill. But Dennis can go alone,’

- a. weil er auch ein Auto hat.  
because he also a car has.  
‘because he has a car, too.’

*additive*

- b. weil er ihr Auto ausleihen darf.  
because he her car borrow may  
‘because he can borrow her car.’

*possessive*

POSITIVE CONTEXT: Dennis wollte mit Carlotta an die Ostsee fahren. Carlotta hat ein Auto, das sie für die Reise nutzen wollten. Leider ist Carlotta krank. Aber Dennis kann alleine fahren, ‘Dennis wanted to go to the Baltic Sea with Carlotta. Carlotta has a car, which they wanted to use for the trip. Unfortunately, Carlotta is ill. But Dennis can go alone,’

- a. weil er auch ein Auto hat.

*additive*

- b. weil er ihr Auto ausleihen darf.

*possessive*

NEUTRAL CONTEXT: Dennis wollte an die Ostsee fahren. Er kann alleine fahren, ‘Dennis wanted to go the Baltic Sea. He can go alone,’

- a. weil er auch ein Auto hat.

*additive*

- b. weil er ihr Auto ausleihen darf.

*possessive*

- (2) MIXED CONTEXT: Paula macht heute einen winterlichen Ausflug mit ihrem Sohn. Sie achtet darauf, auf verschneiten Wegen zu bleiben, ‘Paula is going on a winter excursion with her son today. She is taking care to stay on snow-covered paths’

- a. weil sie auch einen Schlitten hat.  
because she also a sled has.  
‘because she has a sled, too.’

- b. damit sein Schlitten nicht zerkratzt wird.  
so.that his sled not scratched is

‘so that his sled does not get scratched.’

POSITIVE CONTEXT: Paula macht heute einen winterlichen Ausflug mit ihrem Sohn. Er zieht freudig seinen neuen Schlitten hinter sich her. Paula achtet darauf, auf verschneiten Wegen zu bleiben, ‘Paula is going on a winter excursion with her son today. He is eagerly pulling his new sled. Paula is taking care to stay on snow-covered paths’

- a. weil sie auch einen Schlitten hat.
- b. damit sein Schlitten nicht zerkratzt wird.

NEUTRAL CONTEXT: Paula macht heute einen winterlichen Ausflug. Sie achtet darauf, auf verschneiten Wegen zu bleiben, ‘Paula is going on a winter excursion today. She is taking care to stay on snow-covered paths’

- a. weil sie auch einen Schlitten hat.
- b. damit sein Schlitten nicht zerkratzt wird.

- (3) MIXED CONTEXT: Karl ist mit Anna in einem Restaurant. Als den beiden das Essen gebracht wird, fragt Karl den Kellner nach einem scharfen Messer, weil ‘Karl is in a restaurant with Anna. When their food is brought to them, Karl asks the waiter for a sharp knife, because’

- a. er auch ein Steak hat.  
he also a steak has  
‘he has a steak, too.’
- b. er ihr Steak probieren will.  
he her steak try wants  
‘he wants to try her steak.’

POSITIVE CONTEXT: Karl ist mit Anna in einem Restaurant. Anna hat ein Steak bestellt. Als den beiden das Essen gebracht wird, fragt Karl den Kellner nach einem scharfen Messer, weil ‘Karl is in a restaurant with Anna. Anna has ordered a steak. When their food is brought to them, Karl asks the waiter for a sharp knife, because’

- a. er auch ein Steak hat.
- b. er ihr Steak probieren will.

NEUTRAL CONTEXT: Karl ist in einem Restaurant. Als ihm das Essen gebracht wird, fragt er den Kellner nach einem scharfen Messer, weil ‘Karl is in a restaurant. When his food is brought to him, Karl asks the waiter for a sharp knife, because’

- a. er auch ein Steak hat.
- b. er ihr Steak probieren will.

- (4) MIXED CONTEXT: Tanja will mit Tim nach Italien fahren. Sie schlägt vor, einen Zwischenstopp in der Schweiz einzulegen, ‘Tanja wants to travel to Italy with Tim. She proposes to make a stopover in Switzerland,’

- a. weil sie auch Verwandte dort hat.  
because she also relatives there has  
‘because she has relatives there, too.’
- b. weil sie seine Verwandten dort kennenlernen will.  
because she his relatives there get.to.know wants  
‘because she wants to get to know his relatives there.’

POSITIVE CONTEXT: Tanja will mit Tim nach Italien fahren. Tim hat Verwandte in der Schweiz. Tanja schlägt vor, einen Zwischenstopp in der Schweiz einzulegen, 'Tanja wants to travel to Italy with Tim. Tim has relatives in Switzerland. She proposes to make a stopover in Switzerland,'

- a. weil sie auch Verwandte dort hat.
- b. weil sie seine Verwandten dort kennenlernen will.

NEUTRAL CONTEXT: Tanja will nach Italien fahren. Sie überlegt, einen Zwischenstopp in der Schweiz einzulegen, 'Tanja wants to travel to Italy. She considers making a stopover in Switzerland,'

- a. weil sie auch Verwandte dort hat.
- b. weil sie seine Verwandten dort kennenlernen will.

- (5) MIXED CONTEXT: Simone muss heute ein Referat halten. Sie ist nach Julius dran. Simone hat extra einen Adapter für den Beameranschluss mitgebracht, 'Simone has to give a presentation. It is her turn after Julius's. For this occasion, Simone brought an adapter for the projector,'

- a. weil sie auch einen Mac hat.  
because she also a Mac has.  
'because she has a Mac, too.'
- b. weil sie seinen Mac benutzen will.  
because she his Mac use wants  
'because she wants to use his Mac.'

POSITIVE CONTEXT: Simone muss heute ein Referat halten. Sie ist nach Julius dran, der einen Mac hat. Simone hat extra einen Adapter für den Beameranschluss mitgebracht, 'Simone has to give a presentation. It is her turn after Julius's, who has a Mac. For this occasion, Simone brought an adapter for the projector,'

- a. weil sie auch einen Mac hat.
- b. weil sie seinen Mac benutzen will.

NEUTRAL CONTEXT: Simone muss heute ein Referat halten. Sie hat extra einen Adapter für den Beameranschluss mitgebracht, 'Simone has to give a presentation. For this occasion, Simone brought an adapter for the projector,'

- a. weil sie auch einen Mac hat.
- b. weil sie seinen Mac benutzen will.

- (6) MIXED CONTEXT: Laura und ihr Vater sind gerade aus der U-Bahn ausgestiegen. Der Fahrstuhl ist kaputt und auf dem Weg nach oben muss Laura mehrmals anhalten, 'Laura and her father just got out of the subway train. The elevator is broken and on her way up the stairs Laura has to take several breaks,'

- a. weil sie auch eine schwere Tasche hat.  
because she also a heavy bag has.  
'because she has a heavy bag, too.'
- b. weil sie seine schwere Tasche trägt.  
because she his heavy bag carries.  
'because she is carrying his heavy bag.'

POSITIVE CONTEXT: Laura und ihr Vater sind gerade aus der U-Bahn ausgestiegen. Ihr Vater hat eine schwere Reisetasche dabei. Der Fahrstuhl ist kaputt und auf dem Weg nach oben muss Laura

mehrmals anhalten, 'Laura and her father just got out of the subway train. Her father took a heavy bag with him. The elevator is broken and on her way up the stairs Laura has to take several breaks,'

- a. weil sie auch eine schwere Tasche hat.
- b. weil sie seine schwere Tasche trägt.

NEUTRAL CONTEXT: Laura ist gerade aus der U-Bahn ausgestiegen. Der Fahrstuhl ist kaputt und auf dem Weg nach oben muss Laura mehrmals anhalten, 'Laura and just got out of the subway train. The elevator is broken and on her way up the stairs Laura has to take several breaks,'

- a. weil sie auch eine schwere Tasche hat.
- b. weil sie seine schwere Tasche trägt.

- (7) MIXED CONTEXT: Martin will heute etwas Besonderes mit seiner Schwester Lena unternehmen, um 'Martin wants to do something special with his sister Lena today, in order'

- a. zu feiern, dass sie jetzt auch einen Masterabschluss hat.  
to celebrate that she now also a Master's.degree has  
'to celebrate that she has a Master's degree now, too.'
- b. seinen Masterabschluss gebührend zu feiern.  
his Master's.degree properly to celebrate  
'to celebrate his Master's degree properly.'

POSITIVE CONTEXT: Martin, der seit ein paar Monaten einen Masterabschluss hat, will heute etwas Besonderes mit seiner Schwester Lena unternehmen, um 'Martin, who got his Master's degree a few months ago, wants to do something special with his sister Lena today, in order'

- a. zu feiern, dass Lena jetzt auch einen Masterabschluss hat.
- b. seinen Masterabschluss gebührend zu feiern.

NEUTRAL CONTEXT: Lena will heute etwas Besonderes unternehmen, um 'Lena wants to do something special today, in order'

- a. zu feiern, dass sie jetzt auch einen Masterabschluss hat.
- b. seinen Masterabschluss gebührend zu feiern.

- (8) MIXED CONTEXT: Freitag um 21:15 gibt es ein peinliches Interview von Erich bei RTL 2. Er will aber nicht dass seine Freundin Franziska das Interview sieht. Franziska beschließt, es bei sich zuhause anzuschauen, 'Friday at 9:15pm there is a embarrassing interview of Erich on RTL 2 [a German TV channel], but he doesn't want his (girl)friend Franziska to see the interview. Franziska decides to watch it at her home'

- a. weil sie auch einen Fernseher hat.  
because she also a TV has  
"because she has a TV, too."
- b. und schaltet seinen Fernseher aus.  
and turns his TV off  
"and turns off his TV"

POSITIVE CONTEXT: Freitag um 21:15 gibt es ein peinliches Interview von Erich bei RTL 2. Er hat einen Fernseher, er will aber nicht dass seine Freundin Franziska das Interview sieht. Franziska beschließt, es bei sich zuhause anzuschauen, 'Friday at 9:15pm there is a embarrassing interview of

Erich on RTL 2. He has a TV, but he doesn't want his (girl)friend Franziska to see the interview. Franziska decides to watch it at her home'

- a. weil sie auch einen Fernseher hat.
- b. und schaltet seinen Fernseher aus.

NEUTRAL CONTEXT: Freitag um 21:15 gibt es ein peinliches Interview bei RTL 2. Franziska beschließt, es bei sich zuhause anzuschauen, 'Friday at 9:15pm there is a embarrassing interview on RTL 2. Franziska decides to watch it at her home'

- a. weil sie auch einen Fernseher hat.
- b. und schaltet seinen Fernseher aus.

- (9) MIXED CONTEXT: Klara unterhält sich mit ihrem Kommilitonen Jakob darüber, wie es ist, auf dem Land aufzuwachsen. Es stellt sich heraus, 'Klara is talking to her fellow student Jakob about growing up on the countryside. It turns out'

- a. dass Jakob auch eine Schwester hat.  
that Jakob also a sister has  
'that Jakob has a sister, too.'
- b. dass Jakob ihre Schwester kennt.  
that Jakob her sister knows  
'that Jakob knows her sister.'

POSITIVE CONTEXT: Klara unterhält sich mit ihrem Kommilitonen Jakob darüber, wie es ist, auf dem Land aufzuwachsen. Klara hat eine Schwester, über die sie gerade etwas erzählt hat. Es stellt sich heraus, 'Klara is talking to her fellow student Jakob about growing up on the countryside. Klara has a sister, about whom she just told him something. It turns out'

- a. dass Jakob auch eine Schwester hat.
- b. dass Jakob ihre Schwester kennt.

NEUTRAL CONTEXT: Jakob hält einen Monolog darüber, wie es ist, auf dem Land aufzuwachsen. Es stellt sich heraus, 'Jakob is holding a monologue about growing up on the countryside. It turns out'

- a. dass Jakob auch eine Schwester hat.
- b. dass Jakob ihre Schwester kennt.

- (10) MIXED CONTEXT: Tim trifft seine Mutter Annika zufällig vor dem Ärztehaus in der Schönhauser Allee an. Es stellt sich heraus, 'By chance, Tim runs into his mother Annika in front the medical centre in Schönhauser Allee [a street in Berlin]. It turns out'

- a. dass sie auch heute einen Termin hat.  
that she also today an appointment has  
'that she has an appointment today, too.'
- b. dass sie seinen heutigen Termin absagen will.  
that she his today's appointment cancel wants  
'that she wants to cancel his appointment of today.'

POSITIVE CONTEXT: Tim trifft seine Mutter Annika zufällig vor dem Ärztehaus in der Schönhauser Allee an. Tim ist dort, weil er einen Termin beim Arzt hat. Es stellt sich heraus, 'By chance, Tim

runs into his mother Annika in front the medical centre in Schönhauser Allee. Tim is there because he has a doctor's appointment. It turns out'

- a. dass sie auch heute einen Termin hat.
- b. dass sie seinen heutigen Termin absagen will.

NEUTRAL CONTEXT: Annika ist vor dem Ärztehaus in der Schönhauser Allee. Es stellt sich heraus, 'Annika is in front of the medical centre in in Schönhauser Allee. It turns out'

- a. dass sie auch heute einen Termin hat.
- b. dass sie seinen heutigen Termin absagen will.

- (11) MIXED CONTEXT: Laura hat das Gerücht gehört dass Valentin zu seinem Geburtstag eine Snickerstorte ins Büro mitbringen will. Es stellt sich aber heraus, 'Laura has heard the rumour that Valentin wants to bring a snickers cake to work on his birthday. It turns out, however,'

- a. dass Valentin auch eine Erdnussallergie hat.  
that Valentin also a peanut-allergy has  
'that Valentin has a peanut allergy, too.'
- b. dass Valentin von ihrer Erdnussallergie weiß.  
that Valentin of her peanut-allergy knows  
'that Valentin knows of her peanut allergy.'

POSITIVE CONTEXT: Laura hat das Gerücht gehört dass Valentin zu seinem Geburtstag eine Snickerstorte ins Büro mitbringen will. Laura hat eine Erdnussallergie. Es stellt sich aber heraus, 'Laura has heard the rumour that Valentin wants to bring a snickers cake to work on his birthday. Laura has a peanut allergy. It turns out, however,'

- a. dass Valentin auch eine Erdnussallergie hat.
- b. dass Valentin von ihrer Erdnussallergie weiß.

NEUTRAL CONTEXT: Es ging das Gerücht um dass Valentin zu seinem Geburtstag eine Snickerstorte ins Büro mitbringen will. Es stellt sich aber heraus, 'The rumour that Valentin wants to bring a snickers cake to work on his birthday is circulating. It turns out, however,'

- a. dass Valentin auch eine Erdnussallergie hat.
- b. dass Valentin von ihrer Erdnussallergie weiß.

- (12) MIXED CONTEXT: Sarah fragt sich warum sie Jan nicht mehr erreicht. Es stellt sich heraus, 'Sarah is wondering why she cannot reach Jan anymore. It turns out'

- a. dass er auch eine neue Nummer hat.  
that he also a new number has  
'that he has a new number, too.'
- b. dass er ihre neue Nummer blockiert hat.  
that he her new number blocked has  
'that he blocked her new number.'

POSITIVE CONTEXT: Sarah fragt sich warum sie Jan nicht mehr erreicht. Sie hat eine neue Nummer. Es stellt sich heraus, 'Sarah is wondering why she cannot reach Jan anymore. Sarah has a new number. It turns out'

- a. dass er auch eine neue Nummer hat.
- b. dass er ihre neue Nummer blockiert hat.

NEUTRAL CONTEXT: Jan ist telefonisch nicht mehr zu erreichen. Es stellt sich heraus, 'Jan is not reachable via phone anymore. It turns out'

- a. dass er auch eine neue Nummer hat.
- b. dass er ihre neue Nummer blockiert hat.

- (13) MIXED CONTEXT: Alfred mochte seine neue Arbeitskollegin eigentlich ganz gerne als sie bei ihnen angefangen hat. Jetzt sind sie Rivalen, 'Alfred liked his new colleague when she started working with him. Now they are rivals,'

- a. weil er auch Ambitionen auf den Chefsessel hat.  
because he also ambitions on the executive.chair has  
'because he has ambitions to become the boss, too.'
- b. weil er ihre Ambitionen auf den Chefsessel durchkreuzen will.  
because he her ambitions on the executive.chair thwart wants  
'because he wants to thwart her ambitions to become the boss.'

POSITIVE CONTEXT: Alfred mochte seine neue Arbeitskollegin eigentlich ganz gerne als sie bei ihnen angefangen hat. Aber sie hat Ambitionen auf den Chefsessel. Jetzt sind sie Rivalen, 'Alfred liked his new colleague when she started working with him. But she has ambitions to become the boss. Now they are rivals,'

- a. weil er auch Ambitionen auf den Chefsessel hat.
- b. weil er ihre Ambitionen auf den Chefsessel durchkreuzen will.

NEUTRAL CONTEXT: Alfred war ganz beliebt als er in der Firma angefangen hat. Jetzt ist er unbeliebt, 'Alfred was quite popular when he started working in his firm. Now he is unpopular,'

- a. weil er auch Ambitionen auf den Chefsessel hat
- b. weil er ihre Ambitionen auf den Chefsessel durchkreuzen will.

- (14) MIXED CONTEXT: Als Beate Daniel kennengelernt hat, dachte sie dass sie sich nie wiedersehen. Jetzt sehen sie sich aber häufig, 'When Beate met Daniel, she thought they would never see each other again. But now they often see each other,'

- a. weil sie auch eine Wohnung am Ostkreuz hat.  
because she also an apartment at Ostkreuz has  
'because she has an apartment at Ostkreuz, too.'
- b. weil sie ein Zimmer in seiner Wohnung am Ostkreuz gemietet hat  
because she a room in his apartment at Ostkreuz rented has  
'because she rented a room in his apartment at Ostkreuz.'

POSITIVE CONTEXT: Als Beate Daniel kennengelernt hat, dachte sie dass sie sich nie wiedersehen. Daniel hat eine Wohnung am Ostkreuz. Jetzt sehen sie sich aber häufig, 'When Beate met Daniel, she thought they would never see each other again. Daniel has an apartment at Ostkreuz [a station in Berlin]. But now they often see each other,'

- a. weil sie auch eine Wohnung am Ostkreuz hat.
- b. weil sie ein Zimmer in seiner Wohnung am Ostkreuz gemietet hat

NEUTRAL CONTEXT: Als Beate zum ersten Mal am Boxhagener Platz war, dachte sie dass sie nie wieder dort sein würde. Jetzt ist sie aber häufig dort, 'When Beate first went to Boxhagener Platz [a

square close to Ostkreuz], she thought that she would never go there again. But now she often goes there,’

- a. weil sie auch eine Wohnung am Ostkreuz hat.
- b. weil sie ein Zimmer in seiner Wohnung am Ostkreuz gemietet hat.

- (15) MIXED CONTEXT: Christa wollte dass Fabian während ihres Urlaubs ihre Aufgaben übernimmt. Es hat sich nun aber herausgestellt dass sie gleichzeitig im Urlaub sind, ‘Christa wanted Fabian to take over her tasks during her vacation. However, it turned out that they are on vacation at the same time,’

- a. weil sie auch ein Schulkind hat.  
because she also a schoolchild has  
‘because she also has a school-aged child.’
- b. weil sie sein Schulkind im Eltern-Kind-Sommerlager betreut.  
because she his schoolchild in.the parent-child-summercamp look.after  
‘because she will look after his school-aged child at the parent-child-summercamp.’

POSITIVE CONTEXT: Christa wollte dass Fabian während ihres Urlaubs ihre Aufgaben übernimmt. Fabian hat ein Schulkind. Es hat sich nun aber herausgestellt dass sie gleichzeitig im Urlaub sind, ‘Christa wanted Fabian to take over her tasks during her vacation. Fabian has a school-aged child. However, it turned out that they are on vacation at the same time,’

- a. weil sie auch ein Schulkind hat.
- b. weil sie sein Schulkind im Eltern-Kind-Sommerlager betreut.

NEUTRAL CONTEXT: Christa wollte ihre Aufgaben während des Urlaubs abgeben. Sie hat sich für August frei genommen, ‘Christa wanted to leave her tasks [to somebody else] during her vacation. She plans to take her vacation in August’

- a. weil sie auch ein Schulkind hat.
- b. weil sie sein Schulkind im Eltern-Kind-Sommerlager betreut.

- (16) MIXED CONTEXT: Ingmar hat vor einer Woche Hannah kennengelernt. Er ist in derselben Abteilung im Krankenhaus, ‘Ingmar met Hannah a week ago. He is in the same hospital unit’

- a. weil er auch eine seltene Infektionskrankheit hat.  
because he also a rare infectious-disease has  
‘because he has a rare infectious disease, too.’
- b. weil er sich mit ihrer seltenen Infektionskrankheit angesteckt hat  
because he himself with her rare infectious-disease infected has  
‘because he was infected by her with her rare infectious disease.’

POSITIVE CONTEXT: Ingmar hat vor einer Woche Hannah kennengelernt, die eine seltene Infektionskrankheit hat. Er ist in derselben Abteilung im Krankenhaus, ‘Ingmar met Hannah, who has a rare infectious disease, a week ago. He is in the same hospital unit’

- a. weil er auch eine seltene Infektionskrankheit hat.
- b. weil er sich mit ihrer seltenen Infektionskrankheit angesteckt hat

NEUTRAL CONTEXT: Ingmar ist seit einer Woche in der Abteilung für Infektionsepidemiologie im Krankenhaus, ‘Ingmar is in the hospital unit for infection epidemiology since one week,’

- a. weil er auch eine seltene Infektionskrankheit hat.



b. weil er sich mit ihrer seltenen Infektionskrankheit angesteckt hat.

(17) MIXED CONTEXT: Gordon geht zusammen mit Jasmin zum Einstufungstest für einen Kunstkurs. Er wird in dieselbe Gruppe eingeteilt wie Jasmin, ‘Gordon participates in an entry-level test for an art course together with Jasmin. He gets assigned to the same group as Jasmin’

- a. weil er auch einen guten Zeichenstil hat.  
because he also a good drawing-style has  
‘because he also has a good style of drawing.’
- b. weil er ihren guten Zeichenstil kopiert hat.  
because he her good drawing-style copied has  
‘because he copied her good style of drawing.’

POSITIVE CONTEXT: Gordon geht zusammen mit Jasmin zum Einstufungstest für einen Kunstkurs. Jasmin hat einen guten Zeichenstil. Gordon wird in dieselbe Gruppe eingeteilt wie Jasmin, ‘Gordon participates in an entry-level test for an art course together with Jasmin. Jasmin has a good style of drawing. He gets assigned to the same group as Jasmin’

- a. weil er auch einen guten Zeichenstil hat.
- b. weil er ihren guten Zeichenstil kopiert hat.

NEUTRAL CONTEXT: Gordon geht zum Einstufungstest für einen Kunstkurs. Er wird in die beste Gruppe eingeteilt, ‘Gordon participates in an entry-level test for an art course. He gets assigned to the best group’

- a. weil er auch einen guten Zeichenstil hat.
- b. weil er ihren guten Zeichenstil kopiert hat.

(18) MIXED CONTEXT: Krystian hat Maria rechtzeitig daran erinnert, ein Visum für ihre bevorstehende Geschäftsreise zu beantragen. Er weiß dass sie ein Visum braucht, ‘Krystian duly reminded Maria to apply for a visa for her upcoming business trip. He knows that she needs a visa,’

- a. weil er auch die polnische Staatsbürgerschaft hat.  
because he also the Polish citizenship has  
‘because he is a Polish citizen, too.’
- b. weil er schon oft Komplikationen mit ihrer polnischen Staatsbürgerschaft  
because he already often complications with her Polish citizenship  
mitbekommen hat.  
witnessed has  
‘because he has already often witnessed complications with her Polish citizenship.’

POSITIVE CONTEXT: Krystian hat Maria rechtzeitig daran erinnert, ein Visum für ihre bevorstehende Geschäftsreise zu beantragen. Maria hat die polnische Staatsbürgerschaft. Er weiß dass sie ein Visum braucht, ‘Krystian duly reminded Maria to apply for a visa for her upcoming business trip. Maria is a Polish citizen [lit. has the Polish citizenship]. He knows that she needs a visa,’

- a. weil er auch die polnische Staatsbürgerschaft hat.
- b. weil er schon oft Komplikationen mit ihrer polnischen Staatsbürgerschaft mitbekommen hat.

NEUTRAL CONTEXT: Krystian hat sich rechtzeitig daran erinnert, ein Visum für seine bevorstehende Geschäftsreise zu beantragen. Er weiß dass er ein Visum braucht, ‘Krystian duly remembered to apply for a visa for his upcoming business trip. He knows that he needs a visa,’

- a. weil er auch die polnische Staatsbürgerschaft hat.
- b. weil er schon oft Komplikationen mit ihrer polnischen Staatsbürgerschaft mitbekommen hat.

## 2 SUPPLEMENTARY DATA: ITEMS OF EXPERIMENT 2

(1) illustrates how the conditions correspond to the levels of the other factors TRIGGER TYPE and CONTEXT. This holds analogously for the remaining items, where the levels are not explicitly annotated. Capital letters indicate sentence stress.

- (1) MIXED CONTEXT: Dennis wollte mit Carlotta einen dekadenten Ausflug an die Ostsee machen. Leider ist Carlotta krank. Aber Dennis kann trotzdem extravagant verreisen,... ‘Dennis wanted to take a decadent trip to the Baltic Sea with Carlotta. Unfortunately, Carlotta is ill. But Dennis can nevertheless travel extravagantly,’

- a. weil er AUCH ein Cabrio hat.  
because he also a convertible has  
‘because he has a convertible, too.’ *postposed additive*
- b. weil auch ER ein Cabrio hat.  
because also he a convertible has  
‘because he too has a convertible’ *preposed additive*
- c. weil er ihr CABRIO ausleihen darf.  
because he her convertible borrow may  
‘because he can borrow her convertible.’ *possessive*

POSITIVE CONTEXT: Dennis wollte mit Carlotta einen dekadenten Ausflug an die Ostsee machen. Carlotta hat ein Cabrio, das sie für die Reise nutzen wollten. Leider ist Carlotta krank. Aber Dennis kann trotzdem extravagant verreisen,... ‘Dennis wanted to take a decadent trip to the Baltic Sea with Carlotta. Carlotta has a convertible, which they wanted to use for the trip. Unfortunately, Carlotta is ill. But Dennis can nevertheless travel extravagantly,’

- a. weil er AUCH ein Cabrio hat. *postposed additive*
- b. weil auch ER ein Cabrio hat. *preposed additive*
- c. weil er ihr Cabrio AUSLEIHEN darf. *possessive*

NEUTRAL CONTEXT: Dennis will einen dekadenten Ausflug an die Ostsee machen. Er kann extravagant verreisen,... ‘Dennis wants to take a decadent trip to the Baltic Sea. He can travel extravagantly.’

- a. weil er AUCH ein Cabrio hat. *postposed additive*
- b. weil auch ER ein Cabrio hat. *preposed additive*
- c. weil er ihr CABRIO ausleihen darf. *possessive*

- (2) Paula macht heute einen winterlichen Ausflug mit ihrem Sohn. Sie achtet darauf, auf verschneiten Wegen zu bleiben, ‘Paula is going on a winter excursion with her son today. She is taking care to stay on snow-covered paths’

- a. weil sie AUCH einen neuen Holzschlitten hat.  
because she also a new wood-sled has  
‘because she has a new wooden sled, too.’
- b. weil auch SIE einen neuen Holzschlitten hat.  
because also she a new wood-sled has

‘because she too has a new wooden sled.’

- c. damit sein neuer HOLZSCHLITTEN nicht zerkratzt wird.  
so.that his new wood-sled not scratched is  
‘so that his new wooden sled does not get scratched.’

Paula macht heute einen winterlichen Ausflug mit ihrem Sohn. Er zieht freudig seinen neuen Holzschlitten hinter sich her. Paula achtet darauf, auf verschneiten Wegen zu bleiben, ‘Paula is going on a winter excursion with her son today. He is eagerly pulling his new wooden sled. She is taking care to stay on snow-covered paths’

- a. weil sie AUCH einen neuen Holzschlitten hat.
- b. weil auch SIE einen neuen Holzschlitten hat.
- c. damit sein neuer Holzschlitten nicht ZERKRATZT wird.

Paula macht heute einen winterlichen Ausflug. Sie achtet darauf, auf verschneiten Wegen zu bleiben, ‘Paula is going on a winter excursion today. She is taking care to stay on snow-covered paths’

- a. weil sie AUCH einen neuen Holzschlitten hat.
- b. weil auch SIE einen neuen Holzschlitten hat.
- c. damit sein neuer HOLZSCHLITTEN nicht zerkratzt wird.

- (3) Karl ist mit Anna in einem Restaurant. Als den beiden das Essen gebracht wird, fragt Karl den Kellner nach einem scharfen Messer, weil ‘Karl is in a restaurant with Anna. When their food is brought to them, Karl asks the waiter for a sharp knife, because’

- a. er AUCH ein Rinder-Hüftsteak hat.  
he also a beef-sirloin-steak has  
‘he has a sirloin steak, too.’
- b. auch ER ein Rinder-Hüftsteak hat.  
also he a beef-sirloin-steak has  
‘he too has a sirloin steak.’
- c. er ihr RINDER-HÜFTSTEAK probieren will.  
he her beef-sirloin-steak try wants  
‘he wants to try her sirloin steak.’

Karl ist mit Anna in einem Restaurant. Anna hat ein Rinder-Hüftsteak bestellt. Als den beiden das Essen gebracht wird, fragt Karl den Kellner nach einem scharfen Messer, weil ‘Karl is in a restaurant with Anna. Anna has ordered a sirloin steak. When their food is brought to them, Karl asks the waiter for a sharp knife, because’

- a. er AUCH ein Rinder-Hüftsteak hat.
- b. auch ER ein Rinder-Hüftsteak hat.
- c. er ihr Rinder-Hüftsteak PROBIEREN will.

Karl ist in einem Restaurant. Als ihm das Essen gebracht wird, fragt er den Kellner nach einem scharfen Messer, weil ‘Karl is in a restaurant. When his food is brought to him, Karl asks the waiter for a sharp knife, because’

- a. er AUCH ein Rinder-Hüftsteak hat.
- b. auch ER ein Rinder-Hüftsteak hat.
- c. er ihr RINDER-HÜFTSTEAK probieren will.

- (4) Tanja will mit Tim nach Italien fahren. Sie schlägt vor, einen Zwischenstopp in der Schweiz einzulegen, 'Tanja wants to travel to Italy with Tim. She proposes to make a stopover in Switzerland,'
- weil sie dort AUCH einen Cousin hat.  
because she there also a cousin has  
'because she has a cousin there, too.'
  - weil auch SIE dort einen Cousin hat.  
because also she there a cousin has  
'because she too has a cousin there.'
  - weil sie seinen COUSIN dort kennenlernen will.  
because she his cousin there meet wants  
'because she wants to meet his cousin there.'

Tanja will mit Tim nach Italien fahren. Tim hat einen Cousin in der Schweiz. Tanja schlägt vor, einen Zwischenstopp in der Schweiz einzulegen, 'Tanja wants to travel to Italy with Tim. Tim has a cousin in Switzerland. She proposes to make a stopover in Switzerland,'

- weil sie dort AUCH einen Cousin hat.
- weil auch SIE dort einen Cousin hat.
- weil sie seinen Cousin dort KENNENLERNEN will.

Tanja will nach Italien fahren. Sie überlegt, einen Zwischenstopp in der Schweiz einzulegen, 'Tanja wants to travel to Italy. She considers making a stopover in Switzerland,'

- weil sie dort AUCH einen Cousin hat.
- weil auch SIE dort einen Cousin hat.
- weil sie seinen COUSIN dort kennenlernen will.

- (5) Simone muss heute ein Referat halten. Sie ist nach Julius dran. Simone hat extra einen Adapter für den Beameranschluss mitgebracht, 'Simone has to give a presentation. It is her turn after Julius's. For this occasion, Simone brought an adapter for the projector,'
- weil sie AUCH ein MacBook Pro hat.  
because she also a MacBook Pro has  
'because she has a MacBook Pro, too.'
  - weil auch SIE ein MacBook Pro hat.  
because also she a MacBook Pro has  
'because she too has a MacBook Pro.'
  - weil sie sein MACBOOK PRO benutzen will.  
because she his MacBook Pro use wants  
'because she wants to use his MacBook Pro.'

Simone muss heute ein Referat halten. Sie ist nach Julius dran, der ein MacBook Pro hat. Simone hat extra einen Adapter für den Beameranschluss mitgebracht, 'Simone has to give a presentation. It is her turn after Julius's, who has a MacBook Pro. For this occasion, Simone brought an adapter for the projector,'

- weil sie AUCH ein MacBook Pro hat.
- weil auch SIE ein MacBook Pro hat.
- weil sie sein MacBook Pro BENUTZEN will.

Simone muss heute ein Referat halten. Sie hat extra einen Adapter für den Beameranschluss mitgebracht, 'Simone has to give a presentation. For this occasion, Simone brought an adapter for the projector.'

- a. weil sie AUCH ein MacBook Pro hat.
- b. weil auch SIE ein MacBook Pro hat.
- c. weil sie sein MACBOOK PRO benutzen will.

- (6) Laura und ihr Vater sind gerade aus der U-Bahn ausgestiegen. Der Fahrstuhl ist kaputt und auf dem Weg nach oben muss Laura mehrmals anhalten, 'Laura and her father just got out of the subway train. The elevator is broken and on her way up the stairs Laura has to take several breaks.'

- a. weil sie AUCH einen unhandlichen Rollkoffer hat.  
because she also a unwieldy wheeled-suitcase has  
'because she has an unwieldy wheeled suitcase, too.'
- b. weil auch SIE einen unhandlichen Rollkoffer hat.  
because also she a unwieldy wheeled-suitcase has  
'because she too has an unwieldy wheeled suitcase.'
- c. weil sie seinen unhandlichen ROLLKOFFER trägt.  
because she his unwieldy wheeled-suitcase carries  
'because she is carrying his unwieldy wheeled suitcase.'

Laura und ihr Vater sind gerade aus der U-Bahn ausgestiegen. Ihr Vater hat einen unhandlichen Rollkoffer dabei. Der Fahrstuhl ist kaputt und auf dem Weg nach oben muss Laura mehrmals anhalten, 'Laura and her father just got out of the subway train. Her father took an unwieldy wheeled suitcase with him. The elevator is broken and on her way up the stairs Laura has to take several breaks.'

- a. weil sie AUCH einen unhandlichen Rollkoffer hat.
- b. weil auch SIE einen unhandlichen Rollkoffer hat.
- c. weil sie seinen unhandlichen Rollkoffer TRÄGT.

Laura ist gerade aus der U-Bahn ausgestiegen. Der Fahrstuhl ist kaputt und auf dem Weg nach oben muss Laura mehrmals anhalten, 'Laura just got out of the subway train. The elevator is broken and on her way up the stairs Laura has to take several breaks.'

- a. weil sie AUCH einen unhandlichen Rollkoffer hat.
- b. weil auch SIE einen unhandlichen Rollkoffer hat.
- c. weil sie seinen unhandlichen ROLLKOFFER trägt.

- (7) Martin will heute etwas Besonderes mit seiner Schwester Lena unternehmen, ... 'Martin wants to do something special with his sister Lena today, ...'

- a. um zu feiern, dass sie jetzt AUCH einen Abschluss in Mikrobiologie hat.  
for to celebrate that she now also a degree in Microbiology has  
'in order to celebrate that she now has a degree in Microbiology, too.'
- b. um zu feiern, dass jetzt auch SIE einen Abschluss in Mikrobiologie hat.  
for to celebrate that now also she a degree in Microbiology has  
'in order to celebrate that she too now has a degree in Microbiology.'
- c. um seinen Abschluss in MIKROBIOLOGIE gebührend zu feiern.  
for his degree in Microbiology duly to celebrate  
'in order to properly celebrate his degree in Microbiology.'

Martin, der seit ein paar Monaten einen Abschluss in Mikrobiologie hat, will heute etwas Besonderes mit seiner Schwester Lena unternehmen, ... 'Martin, who has a degree in Microbiology since a couple of months, wants to do something special with his sister Lena today, ...'

- a. um zu feiern, dass sie jetzt AUCH einen Abschluss in Mikrobiologie hat.
- b. um zu feiern, dass jetzt auch SIE einen Abschluss in Mikrobiologie hat.
- c. um seinen Abschluss in Mikrobiologie gebührend zu FEIERN.

Lena will heute etwas Besonderes unternehmen, 'Lena wants to do something special today,'

- a. um zu feiern, dass sie jetzt AUCH einen Abschluss in Mikrobiologie hat.
- b. um zu feiern, dass jetzt auch SIE einen Abschluss in Mikrobiologie hat.
- c. um seinen Abschluss in MIKROBIOLOGIE gebührend zu feiern.

- (8) Erich schwärmt seiner Freundin Franziska von einer atemberaubenden Dokumentation vor, die am Freitagabend im Fernsehen laufen wird. Franziska freut sich, die tollen Bilder genießen zu können, ... 'Eric went into raptures about a breathtaking documentary that will run on TV on Friday evening. Franziska is looking forward to enjoying the stunning images ...'

- a. weil sie AUCH einen 65-Zoll-Fernseher hat.  
since she also a 65-inch-TV has  
'since she has a 65 inch TV, too.'
- b. weil auch SIE einen 65-Zoll-Fernseher hat.  
since also she a 65-inch-TV has  
'since she too has a 65 inch TV.'
- c. weil sie auf seinem 65-ZOLL-FERNSEHER mitschauen darf.  
since she on his 65-inch-TV with-watch may  
'since she may watch it with him on his 65 inch TV.'

Erich schwärmt seiner Freundin Franziska von einer atemberaubenden Dokumentation vor, die am Freitagabend im Fernsehen laufen wird. Erich hat einen 65-Zoll-Fernseher. Franziska freut sich, die tollen Bilder genießen zu können, ... 'Eric went into raptures about a breathtaking documentary, that will run on TV on Friday evening. Eric has a 65 inch TV. Franziska is looking forward to enjoying the stunning images ...'

- a. weil sie AUCH einen 65-Zoll-Fernseher hat.
- b. weil auch SIE einen 65-Zoll-Fernseher hat.
- c. weil sie auf seinem 65-Zoll-Fernseher MITSCHAUEN darf.

Am Freitagabend läuft eine atemberaubende Dokumentation im Fernsehen. Franziska freut sich, die tollen Bilder genießen zu können, ... 'A breathtaking documentary will run on TV on Friday evening. Franziska is looking forward to enjoying the stunning images ...'

- a. weil sie AUCH einen 65-Zoll-Fernseher hat.
- b. weil auch SIE einen 65-Zoll-Fernseher hat.
- c. weil sie auf seinem 65-ZOLL-FERNSEHER mitschauen darf.

- (9) Klara unterhält sich mit ihrem Kommilitonen Jakob darüber, wie es ist, auf dem Land aufzuwachsen. Es stellt sich heraus, 'Klara is talking to her fellow student Jakob about growing up on the countryside. It turns out'

- a. dass Jakob AUCH eine Zwillingsschwester hat.  
that Jakob also a twin-sister has

- ‘that Jakob has a twin sister, too.’
- b. dass auch JAKOB eine Zwillingsschwester hat.  
that also Jakob a twin-sister has  
‘that Jakob too has a twin sister.’
- c. dass Jakob ihre ZWILLINGSSCHWESTER kennt.  
that Jakob her twin-sister knows  
‘that Jakob knows her twin sister.’

Klara unterhält sich mit ihrem Kommilitonen Jakob darüber, wie es ist, auf dem Land aufzuwachsen. Klara hat eine Zwillingsschwester, über die sie gerade etwas erzählt hat. Es stellt sich heraus, ‘Klara is talking to her fellow student Jakob about growing up on the countryside. Klara has a twin sister, about whom she just told him something. It turns out’

- a. dass Jakob AUCH eine Zwillingsschwester hat.  
b. dass auch JAKOB eine Zwillingsschwester hat.  
c. dass Jakob ihre Zwillingsschwester KENNT.

Jakob hält einen Monolog darüber, wie es ist, auf dem Land aufzuwachsen. Es stellt sich heraus, ‘Jakob is holding a monologue about growing up on the countryside. It turns out’

- a. dass Jakob AUCH eine Zwillingsschwester hat.  
b. dass auch JAKOB eine Zwillingsschwester hat.  
c. dass Jakob ihre ZWILLINGSSCHWESTER kennt.

- (10) Tim trifft seine Mutter Annika zufällig vor dem Ärztehaus in der Schönhauser Allee an. Annika ist dort, ‘By chance, Tim runs into his mother Annika in front the medical centre in Schönhauser Allee. She is there’

- a. weil sie AUCH heute einen Termin zur Blutabnahme hat.  
because she also today an appointment for.the venipuncture has  
‘because she has an appointment for a blood test today, too.’
- b. weil auch SIE heute einen Termin zur Blutabnahme hat.  
because also she today an appointment for.the venipuncture has  
‘because she too has an appointment for a blood test today.’
- c. weil sie seinen heutigen Termin zur BLUTABNAHME absagen will.  
because she his today’s appointment for.the venipuncture cancel wants  
‘because she wants to cancel his appointment for a blood test of today.’

Tim trifft seine Mutter Annika zufällig vor dem Ärztehaus in der Schönhauser Allee an. Tim hat einen Termin zur Blutabnahme. Annika ist dort, ‘By chance, Tim runs into his mother Annika in front the medical centre in Schönhauser Allee. Tim has an appointment for a blood test. Annika is there’

- a. weil sie AUCH heute einen Termin zur Blutabnahme hat.  
b. weil auch SIE heute einen Termin zur Blutabnahme hat.  
c. weil sie seinen heutigen Termin zur Blutabnahme ABSAGEN will.

Annika ist vor dem Ärztehaus in der Schönhauser Allee. Sie ist dort, ‘Annika is in front of the medical centre in Schönhauser Allee. She is there’

- a. weil sie AUCH heute einen Termin zur Blutabnahme hat.  
b. weil auch SIE heute einen Termin zur Blutabnahme hat.

c. weil sie seinen heutigen Termin zur BLUTABNAHME absagen will.

- (11) Laura hat das Gerücht gehört dass Valentin zu seinem Geburtstag eine Snickerstorte ins Büro mitbringen will. Es stellt sich aber heraus, ‘Laura has heard the rumour that Valentin wants to bring a snickers cake to work on his birthday. It turns out, however,’
- a. dass Valentin AUCH eine lebensbedrohliche Erdnussallergie hat.  
that Valentin also a life-threatening peanut-allergy has  
‘that Valentin has a life-threatening peanut allergy, too.’
  - b. dass auch VALENTIN eine lebensbedrohliche Erdnussallergie hat.  
that also Valentin a life-threatening peanut-allergy has  
‘that Valentin too has a life-threatening peanut allergy.’
  - c. dass Valentin von ihrer lebensbedrohlichen ERDNUSSALLERGIE weiß.  
that Valentin of her life-threatening peanut-allergy knows  
‘that Valentin knows of her life-threatening peanut allergy.’

Laura hat das Gerücht gehört dass Valentin zu seinem Geburtstag eine Snickerstorte ins Büro mitbringen will. Laura hat eine lebensbedrohliche Erdnussallergie. Es stellt sich aber heraus, ‘Laura has heard the rumour that Valentin wants to bring a snickers cake to work on his birthday. Laura has a life-threatening peanut allergy. It turns out, however,’

- a. dass Valentin AUCH eine lebensbedrohliche Erdnussallergie hat.
- b. dass auch VALENTIN eine lebensbedrohliche Erdnussallergie hat.
- c. dass Valentin von ihrer lebensbedrohlichen Erdnussallergie WEISS.

Es ging das Gerücht um dass Valentin zu seinem Geburtstag eine Snickerstorte ins Büro mitbringen will. Es stellt sich aber heraus, ‘The rumour that Valentin wants to bring a snickers cake to work on his birthday is circulating. It turns out, however,’

- a. dass Valentin AUCH eine lebensbedrohliche Erdnussallergie hat.
- b. dass auch VALENTIN eine lebensbedrohliche Erdnussallergie hat.
- c. dass Valentin von ihrer lebensbedrohlichen ERDNUSSALLERGIE weiß.

- (12) Sarah fragt sich warum sie Jan nicht mehr erreicht. Es stellt sich heraus, ‘Sarah is wondering why she cannot reach Jan anymore. It turns out’
- a. dass er AUCH eine neue Festnetznummer hat.  
that he also a new landline-number has  
‘that he has a new landline number, too.’
  - b. dass auch ER eine neue Festnetznummer hat.  
that also he a new landline-number has  
‘that he too has a new landline number.’
  - c. dass er ihre neue FESTNETZNUMMER blockiert hat.  
that he her new landline-number blocked has  
‘that he blocked her new landline number.’

Sarah fragt sich warum sie Jan nicht mehr erreicht. Sie hat eine neue Festnetznummer. Es stellt sich heraus, ‘Sarah is wondering why she cannot reach Jan anymore. Sarah has a new landline number. It turns out’

- a. dass er AUCH eine neue Festnetznummer hat.
- b. dass auch ER eine neue Festnetznummer hat.
- c. dass er ihre neue Festnetznummer BLOCKIERT hat.



Jan ist telefonisch nicht mehr zu erreichen. Es stellt sich heraus, 'Jan is not reachable via phone anymore. It turns out'

- a. dass er AUCH eine neue Festnetznummer hat.
- b. dass auch ER eine neue Festnetznummer hat.
- c. dass er ihre neue FESTNETZNUMMER blockiert hat.

- (13) Alfred mochte seine neue Arbeitskollegin eigentlich ganz gerne als sie bei ihnen angefangen hat. Jetzt sind sie Rivalen, 'Alfred liked his new colleague when she started working with him. Now they are rivals,'

- a. weil er AUCH zwanghafte Ambitionen auf den Chefsessel hat.  
because he also obsessive ambitions on the executive.chair has  
'because he has obsessive ambitions to become the boss, too.'
- b. weil auch ER zwanghafte Ambitionen auf den Chefsessel hat.  
because also he obsessive ambitions on the executive.chair has  
'because he too has obsessive ambitions to become the boss.'
- c. weil er ihre zwanghaften Ambitionen auf den CHEFSESSEL durchkreuzen will.  
because he her obsessive ambitions on the executive.chair thwart wants  
'because he wants to thwart her obsessive ambitions to become the boss.'

Alfred mochte seine neue Arbeitskollegin eigentlich ganz gerne als sie bei ihnen angefangen hat. Aber sie hat zwanghafte Ambitionen auf den Chefsessel. Jetzt sind sie Rivalen, 'Alfred liked his new colleague when she started working with him. But she has obsessive ambitions to become the boss. Now they are rivals,'

- a. weil er AUCH zwanghafte Ambitionen auf den Chefsessel hat.
- b. weil auch ER zwanghafte Ambitionen auf den Chefsessel hat.
- c. weil er ihre zwanghaften Ambitionen auf den Chefsessel DURCHKREUZEN will.

Alfred war ganz beliebt als er in der Firma angefangen hat. Jetzt ist er unbeliebt, 'Alfred was quite popular when he started working in his firm. Now he is unpopular,'

- a. weil er AUCH zwanghafte Ambitionen auf den Chefsessel hat.
- b. weil auch ER zwanghafte Ambitionen auf den Chefsessel hat.
- c. weil er ihre zwanghaften Ambitionen auf den CHEFSESSEL durchkreuzen will.

- (14) Als Beate Daniel kennengelernt hat, dachte sie dass sie sich nie wiedersehen. Jetzt sehen sie sich aber häufig, 'When Beate met Daniel, she thought they would never see each other again. But now they often see each other,'

- a. weil sie AUCH eine Wohnung in der Sonntagstraße hat.  
because she also an apartment in the Sonntagstraße has  
'because she has an apartment in Sonntagstraße [a street in Berlin], too.'
- b. weil auch SIE eine Wohnung in der Sonntagstraße hat.  
because also she an apartment in the Sonntagstraße has  
'because she too has an apartment in Sonntagstraße.'
- c. weil sie ein Zimmer in seiner Wohnung in der SONNTAGSTRASSE gemietet hat.  
because she a room in his apartment in the Sonntagstraße rented has  
'because she rented a room in his apartment in Sonntagstraße.'

Als Beate Daniel kennengelernt hat, dachte sie dass sie sich nie wiedersehen. Daniel hat eine Wohnung in der Sonntagstraße. Jetzt sehen sie sich aber häufig, 'When Beate met Daniel, she

thought they would never see each other again. Daniel has an apartment in Sonntagstraße. But now they often see each other,’

- a. weil sie AUCH eine Wohnung in der Sonntagstraße hat.
- b. weil auch SIE eine Wohnung in der Sonntagstraße hat.
- c. weil sie in seiner Wohnung in der Sonntagstraße ein ZIMMER gemietet hat.

Als Beate zum ersten Mal am Boxhagener Platz war, dachte sie dass sie nie wieder dort sein würde. Jetzt ist sie aber häufig dort, ‘When Beate first went to Boxhagener Platz [a square close to Ostkreuz], she thought that she would never go there again. But now she often goes there,’

- a. weil sie AUCH eine Wohnung in der Sonntagstraße hat.
- b. weil auch SIE eine Wohnung in der Sonntagstraße hat.
- c. weil sie ein Zimmer in seiner Wohnung in der SONNTAGSTRASSE gemietet hat.

- (15) Christa wollte dass Fabian während ihres Urlaubs ihre Aufgaben übernimmt. Es hat sich nun aber herausgestellt dass sie gleichzeitig im Urlaub sind, ‘Christa wanted Fabian to take over her tasks during her vacation. However, it turned out that they are on vacation at the same time,’

- a. weil sie AUCH zwei schulpflichtige Söhne hat.  
because she also two compulsory-school-aged sons has  
‘because she has two school-aged sons, too.’
- b. weil auch SIE zwei schulpflichtige Söhne hat.  
because also she two compulsory-school-aged sons has  
‘because she too has two school-aged sons.’
- c. weil sie seine zwei schulpflichten Söhne im  
because she his two compulsory-school-aged sons in.the  
Eltern-Kind-SOMMERLAGER betreut.  
parent-child-summercamp look.after  
‘because she will look after his two school-aged sons at the parent-child-summercamp.’

Christa wollte dass Fabian während ihres Urlaubs ihre Aufgaben übernimmt. Fabian hat zwei schulpflichtige Söhne. Es hat sich nun aber herausgestellt dass sie gleichzeitig im Urlaub sind, ‘Christa wanted Fabian to take over her tasks during her vacation. Fabian has two school-aged sons. However, it turned out that they are on vacation at the same time,’

- a. weil sie AUCH zwei schulpflichtige Söhne hat.
- b. weil auch SIE zwei schulpflichtige Söhne hat.
- c. weil sie seine zwei schulpflichten Söhne im Eltern-Kind-SOMMERLAGER betreut.

Christa wollte ihre Aufgaben während des Urlaubs abgeben. Sie hat sich für August frei genommen, ‘Christa wanted to leave her tasks [to somebody else] during her vacation. She plans to take her vacation in August’

- a. weil sie AUCH zwei schulpflichtige Söhne hat.
- b. weil auch SIE zwei schulpflichtige Söhne hat.
- c. weil sie seine zwei schulpflichten Söhne im Eltern-Kind-SOMMERLAGER betreut.

- (16) Ingmar hat vor einer Woche Hannah kennengelernt. Er ist in derselben Abteilung im Krankenhaus, ‘Ingmar met Hannah a week ago. He is in the same hospital unit’

- a. weil er AUCH eine seltene Infektionskrankheit hat.  
because he also a rare infectious-disease has

- ‘because he has a rare infectious disease, too.’
- b. weil auch ER eine seltene Infektionskrankheit hat.  
because also he a rare infectious-disease has  
‘because he too has a rare infectious disease.’
  - c. weil er sich mit ihrer seltenen INFEKTIONSKRANKHEIT angesteckt hat.  
because he himself with her rare infectious-disease infected has  
‘because he was infected by her with her rare infectious disease.’

Ingmar hat vor einer Woche Hannah kennengelernt, die eine seltene Infektionskrankheit hat. Er ist in derselben Abteilung im Krankenhaus, ‘Ingmar met Hannah, who has a rare infectious disease, a week ago. He is in the same hospital unit’

- a. weil er AUCH eine seltene Infektionskrankheit hat.
- b. weil auch ER eine seltene Infektionskrankheit hat.
- c. weil er sich mit ihrer seltenen Infektionskrankheit ANGESTECKT hat.

Ingmar ist seit einer Woche in der Abteilung für Infektionsepidemiologie im Krankenhaus, ‘Ingmar is in the hospital unit for infection epidemiology since one week,’

- a. weil er AUCH eine seltene Infektionskrankheit hat.
- b. weil auch ER eine seltene Infektionskrankheit hat.
- c. weil er sich mit ihrer seltenen INFEKTIONSKRANKHEIT angesteckt hat.

- (17) Gordon geht zusammen mit Jasmin zum Einstufungstest für einen Kunstkurs. Er wird in dieselbe Gruppe eingeteilt wie Jasmin, ‘Gordon participates in an entry-level test for an art course together with Jasmin. He gets assigned to the same group as Jasmin’

- a. weil er AUCH einen besonders originellen Zeichenstil hat.  
because he also a particularly original drawing-style has  
‘because he has a particularly original style of drawing, too.’
- b. weil auch ER einen besonders originellen Zeichenstil hat.  
because also he a particularly original drawing-style has  
‘because he too has a particularly original style of drawing.’
- c. weil er ihren besonders originellen Zeichenstil KOPIERT hat.  
because he her good drawing-style copied has  
‘because he copied her particularly original style of drawing.’

Gordon geht zusammen mit Jasmin zum Einstufungstest für einen Kunstkurs. Jasmin hat einen besonders originellen Zeichenstil. Gordon wird in dieselbe Gruppe eingeteilt wie Jasmin, ‘Gordon participates in an entry-level test for an art course together with Jasmin. Jasmin has a particularly original style of drawing. He gets assigned to the same group as Jasmin’

- a. weil er AUCH einen besonders originellen Zeichenstil hat.
- b. weil auch ER einen besonders originellen Zeichenstil hat.
- c. weil er ihren besonders originellen ZEICHENSTIL kopiert hat.

Gordon geht zum Einstufungstest für einen Kunstkurs. Er wird in die beste Gruppe eingeteilt, ‘Gordon participates in an entry-level test for an art course. He gets assigned to the best group’

- a. weil er AUCH einen besonders originellen Zeichenstil hat.
- b. weil auch ER einen besonders originellen Zeichenstil hat.
- c. weil er ihren besonders originellen ZEICHENSTIL kopiert hat.

- (18) Krystian hat Maria rechtzeitig daran erinnert, ein Visum für ihre bevorstehende Geschäftsreise zu beantragen. Er weiß dass sie ein Visum braucht, ‘Krystian duly reminded Maria to apply for a visa for her upcoming business trip. He knows that she needs a visa,’
- a. weil er AUCH die polnische Staatsbürgerschaft hat.  
because he also the Polish citizenship has  
‘because he is a Polish citizen, too.’
  - b. weil auch ER die polnische Staatsbürgerschaft hat.  
because also he the Polish citizenship has  
‘because he too is a Polish citizen.’
  - c. weil er schon oft Komplikationen mit ihrer polnischen  
because he already often complications with her Polish  
STAATSBÜRGERSCHAFT mitbekommen hat.  
citizenship witnessed has  
‘because he has already often witnessed complications with her Polish citizenship.’

Krystian hat Maria rechtzeitig daran erinnert, ein Visum für ihre bevorstehende Geschäftsreise zu beantragen. Maria hat die polnische Staatsbürgerschaft. Er weiß dass sie ein Visum braucht, ‘Krystian duly reminded Maria to apply for a visa for her upcoming business trip. Maria is a Polish citizen [lit. has the Polish citizenship]. He knows that she needs a visa,’

- a. weil er AUCH die polnische Staatsbürgerschaft hat.
- b. weil auch ER die polnische Staatsbürgerschaft hat.
- c. weil er schon oft Komplikationen mit ihrer polnischen Staatsbürgerschaft MITBEKOMMEN hat.

Krystian hat sich rechtzeitig daran erinnert, ein Visum für seine bevorstehende Geschäftsreise zu beantragen. Er weiß dass er ein Visum braucht, ‘Krystian duly remembered to apply for a visa for his upcoming business trip. He knows that he needs a visa,’

- a. weil er AUCH die polnische Staatsbürgerschaft hat.
- b. weil auch ER die polnische Staatsbürgerschaft hat.
- c. weil er schon oft Komplikationen mit ihrer polnischen STAATSBÜRGERSCHAFT mitbekommen hat.
